# Supplementary material for: One-step synthesis of photoluminescent nanofluids by direct loading of reactively sputtered cubic ZrN nanoparticles into organic liquids
Source: Royal Society of Chemistry journal article supplement (doi:10.1039/d3nr03999d), 2023-12-22
Supplement: d3nr03999d1.pdf [file d3nr03999d1.pdf]

## One-step synthesis of photoluminescent nanofluids by direct loading of reactively sputtered cubic ZrN nanoparticles into organic liquids

*Mariia Protsak,<sup>a</sup> Kateryna Biliak,<sup>a</sup> Daniil Nikitin,<sup>a</sup> Pavel Pleskunov,<sup>a</sup> Marco Tosca,<sup>a,b</sup> Suren Ali-Ogly,<sup>a</sup> Jan Hanuš,<sup>a</sup> Lenka Hanyková,<sup>a</sup> Veronika Červenková,<sup>a</sup> Anastasiya Sergievskaya,<sup>c</sup> Stephanos Konstantinidis,<sup>c</sup> David Cornil,<sup>d</sup> Jérôme Cornil,<sup>d</sup> Miroslav Cieslar,<sup>e</sup> Tereza Košutová,<sup>f</sup> Tomáš Popelář,<sup>g</sup> Lukáš Ondič,<sup>g</sup> Andrei Choukourov<sup>\*a</sup>*

### Electronic Supplementary Information

#### *Details of the conductive AFM measurements*

The AFM measurements were performed in ambient air with a relative humidity of 40 % and at room temperature. We used the same highly durable and highly conductive single diamond tip (TipsNano, DEP01, boron-doped diamond, macroscopic resistivity is 0.003-0.005 Ohm×m, tip radius is 7 nm) for all measurements, including scanning in the amplitude modulation intermittent contact mode and acquiring current-voltage (I-V) curves in the contact mode. The spring constant of 1.6 N/m was calculated from the resonant frequency of the cantilever (52 kHz) and its geometrical dimensions using the Sader method. The dependence of the contact force on setpoint was calibrated by acquiring curves of the cantilever deflection versus distance in the contact mode using 100-nm Au-covered silicon as a substrate. All I-V curves were acquired at the same contact force of 20 nN between the tip and the substrate.

For the measurements, we prepared a sub-monolayer of ZrN NPs on Au-covered silicon. The Au film was grounded, while the bias was supplied to the AFM tip. First, the sample was scanned in an intermittent contact mode at scan sizes of 1 × 1 μm and 250 × 250 nm to identify the area of interest (Figure S 1a and b). The device was then switched to a contact mode, the tip was brought into contact with the uncovered Au substrate, and the I-V curves were recorded by applying a voltage bias of -1.0 V – +1.0 V between the tip and the Au film. Then, the instrument feedback was turned off, the tip was positioned on top of a specific ZrN NP, the instrument feedback was turned on, and the I-V curves were recorded. It should be noted that positioning of the tip on top of the ZrN NPs was not always precise because of thermal drifts. On certain occasions, the approaching tip shifted the NPs from their original positions and got in contact with Au instead of ZrN. Obtaining the I-V curve of a shape similar to that of Au was taken as

a criterion of bad positioning, and such data were discarded. Obtaining the I-V curve of a shape significantly different from that of Au was taken as a criterion of good contact. After the I-V measurements, the area of interest was scanned again in the intermittent contact mode to ensure that the topography of the surface and the tip shape did not change (Figure S 1c). Note that one NP (designated by a cross) was moved away from the original position after interaction with the tip, and its I-V curves were discarded.

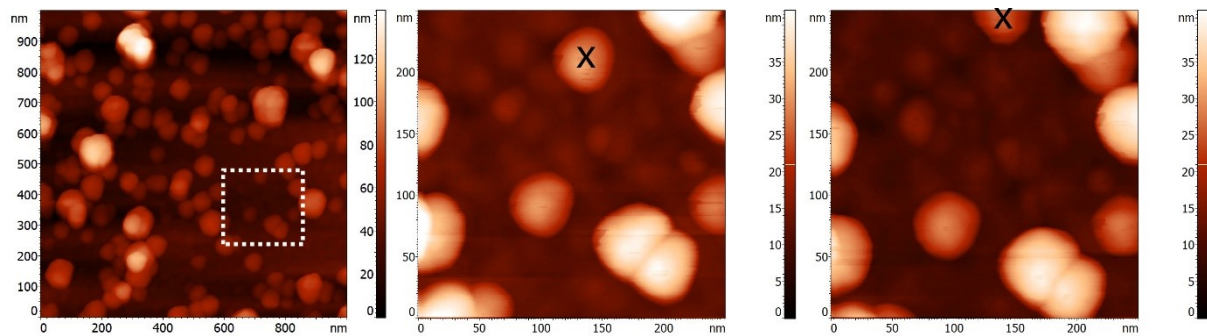

Figure S 1 AFM semicontact height images of ZrN NPs on Au: a) scan size of  $1 \times 1 \mu\text{m}$  before acquiring I-V curves; b) scan size of  $250 \times 250 \text{ nm}$  before acquiring I-V curves; c) scan size of  $250 \times 250 \text{ nm}$  after acquiring I-V curves.

*Size distribution of Zr and ZrN NPs calculated from the SEM images*

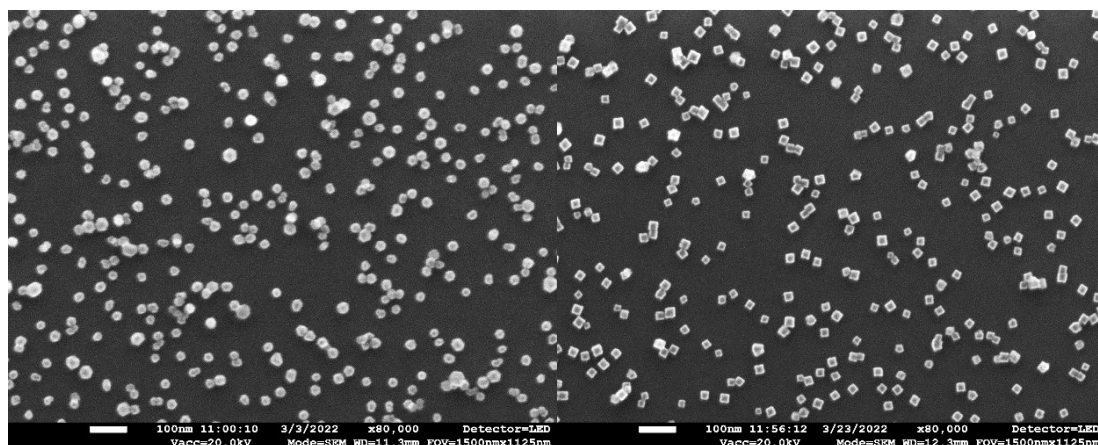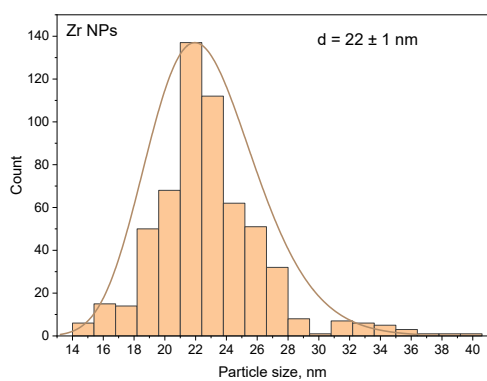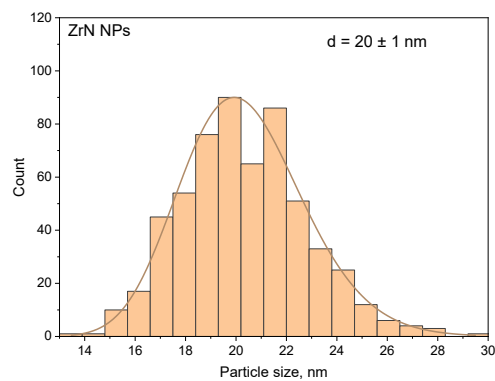

Figure S 2 SEM images and corresponding size histograms of Zr and ZrN NPs deposited on Si. The histograms were fitted by lognormal size distribution functions.

### Details of the DFT calculations

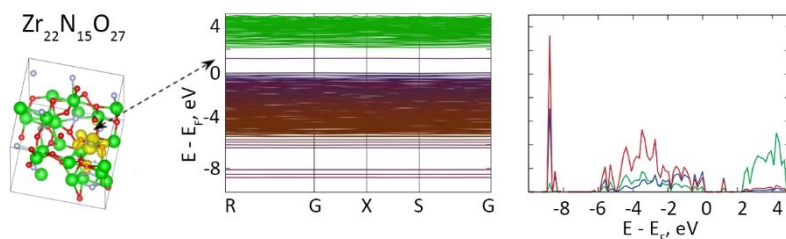

Figure S 3 Formation of the gap state in  $Zr_{22}N_{15}O_{27}$  due to N-O hybridization (formation of the Zr-O-N-O-Zr linkage) as obtained by the DFT calculations.

Table S 1 Lattice parameters of ZrN cells (64 atoms in total) with different extent of oxygen substitutions obtained from the DFT calculations.

| Sample                | Lattice parameters |       |       |                 |                |                 |
|-----------------------|--------------------|-------|-------|-----------------|----------------|-----------------|
|                       | a, Å               | b, Å  | c, Å  | $\alpha$ , deg. | $\beta$ , deg. | $\gamma$ , deg. |
| $Zr_{32}N_{32}$       | 9.193              | 9.193 | 9.193 | 90.0            | 90.0           | 90.0            |
| $Zr_{32}N_{28}O_4$    | 9.200              | 9.203 | 9.200 | 89.9            | 89.9           | 90.1            |
| $Zr_{30}N_{23}O_{11}$ | 9.180              | 9.343 | 9.331 | 90.0            | 89.3           | 90.5            |
| $Zr_{22}N_{15}O_{27}$ | 9.442              | 9.447 | 9.381 | 90.4            | 89.1           | 86.2            |

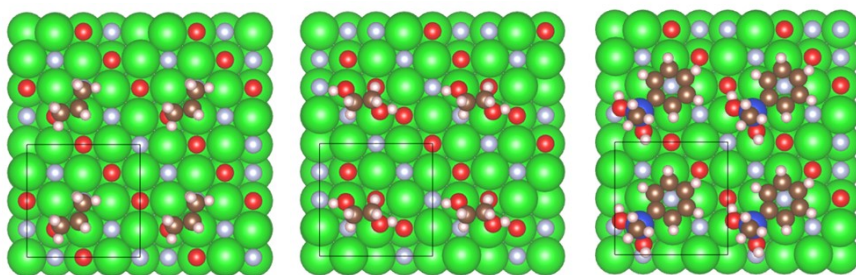

Figure S 4 Relaxed interface geometries of propane, ethylene glycol, and methyl(phenyl)silanediol on the  $Zr_2NO$  (100) surface.

### *Transfer of ZrN NPs from solid supports to liquids by ultrasonication*

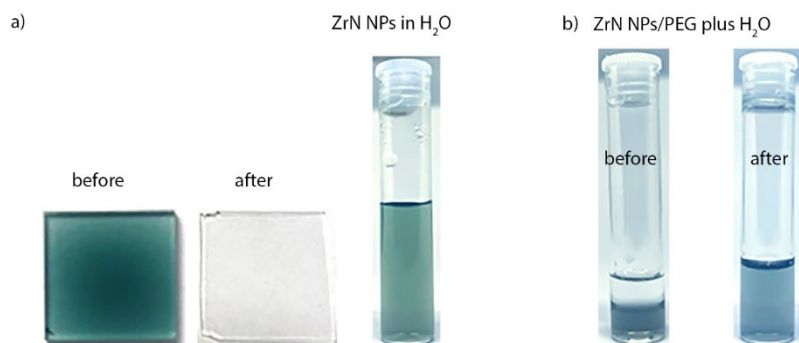

Figure S 5 a) Photos of ZrN NPs deposited on quartz substrate before and after 5-min ultrasonication in distilled H<sub>2</sub>O and photo of a vial with the resultant ZrN/H<sub>2</sub>O nanofluid; b) photos of the vial with ZrN/PEG nanofluid and H<sub>2</sub>O added on top of it before and after 5-min ultrasonication.

### *UV-Vis measurements of Zr and ZrN NPs deposited on quartz substrates*

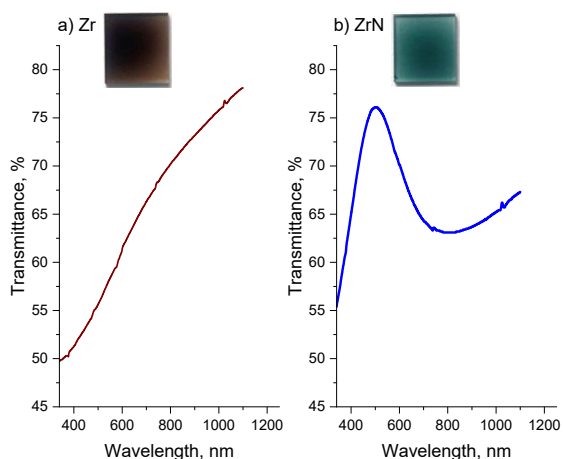

Figure S 6 Optical transmittance spectra of: a) Zr NPs on quartz; b) ZrN NPs on quartz. The insets show the photos of the samples taken against a white background.

## Chemical properties of the host liquids

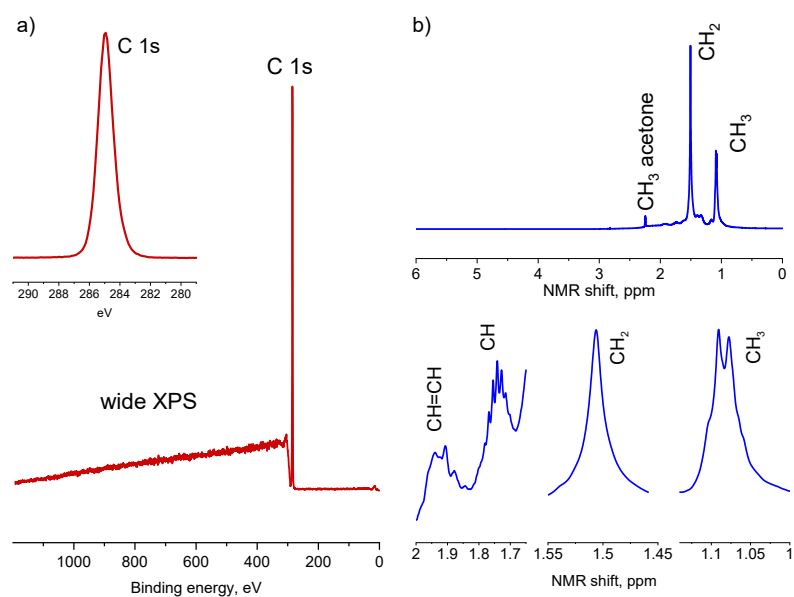

Figure S 7 a) Environmental XPS wide and high-resolution spectra taken directly on liquid paraffin under vacuum of  $5 \times 10^{-4}$  Pa; no other elements except for C are detected; b) NMR <sup>1</sup>H wide and selected regions spectra of paraffin in CDCl<sub>3</sub>.

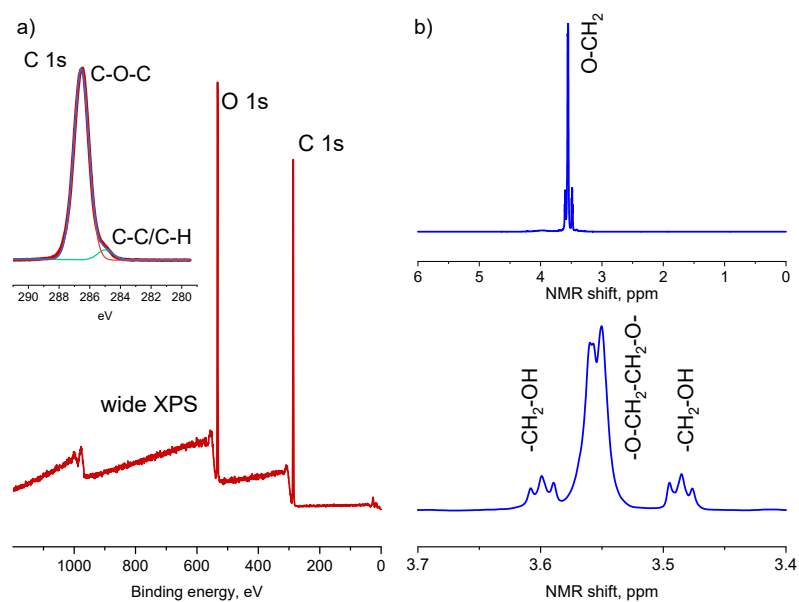

Figure S 8 a) Environmental XPS wide and high-resolution spectra taken directly on liquid PEG under vacuum of  $5 \times 10^{-4}$  Pa; no other elements except for C and O are detected; b) NMR <sup>1</sup>H wide and selected regions spectra of PEG in CDCl<sub>3</sub>. The triplets at 3.6 and 3.5 ppm are associated with the CH<sub>2</sub> units incorporated at the ends of PEG molecule.

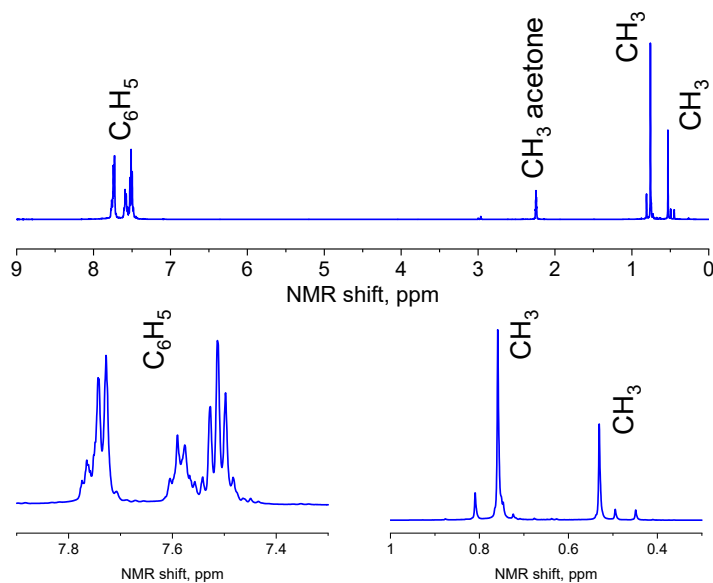

Figure S 9 NMR  $^1\text{H}$  wide and selected regions spectra of PTT in  $\text{CDCl}_3$ . Small signals at 0.8, 0.5, and 0.45 ppm are related to the  $\text{CH}_3$  groups from the impurities in PTT.

#### *Details of the PL measurements and calculations*

The PL decay curves at various wavelengths were extracted from the temporally resolved PL measurements. A single exponential decay function was found to fit the data unsatisfactorily; hence, multiexponential functions were chosen to model the PL decays while keeping the number of fitting parameters as low as possible. The PL decay dynamics of the blank solvents was reliably fitted with a two-exponential function, whereas ZrN nanofluids required a three-exponential function. The necessary addition of the third exponential points to the interaction between the NPs and the solvents. The individual decay components of the fits can be found in Table S1 of ESI. Here, the average PL decay times  $\tau_{avg}$  were extracted from the results of the fits according to Equation S1:

$$\tau_{avg} = \frac{A_1\tau_1^2 + A_2\tau_2^2 + A_3\tau_3^2}{A_1\tau_1 + A_2\tau_2 + A_3\tau_3} \quad (\text{Equation S1})$$

Table S 2 PL decay times obtained from fitting of the time-resolved decay curves of ZrN/PEG, Zr/paraffin, and ZrN/PTT nanofluids and the blank solvents.

| sample | Excitation | time | Emission | $A_1$ | $\tau_1$ , ns | $A_2$ | $\tau_2$ , ns | $A_3$ | $\tau_3$ , ns | $\tau_{avg}$ |
|--------|------------|------|----------|-------|---------------|-------|---------------|-------|---------------|--------------|
|--------|------------|------|----------|-------|---------------|-------|---------------|-------|---------------|--------------|

|              | $\lambda$ , nm | window, ns | $\lambda$ , nm |       |      |       |       |       |       | ns    |
|--------------|----------------|------------|----------------|-------|------|-------|-------|-------|-------|-------|
| PEG          | 355 nm         | 100        | 410 nm         | 0.958 | 1.0  | 0.104 | 5.1   | 0.000 | 0.0   | 2.46  |
| ZrN/PEG      | 355 nm         | 100        | 410 nm         | 0.156 | 15.6 | 0.890 | 3.3   | 0.000 | 0.0   | 8.89  |
| ZrN/PEG      | 355 nm         | 500        | 410 nm         | 1.013 | 5.8  | 0.053 | 39.1  | 0.000 | 0.0   | 14.49 |
| paraffin     | 355 nm         | 500        | 390 nm         | 0.772 | 6.1  | 0.289 | 56.7  | 0.000 | 0.0   | 45.45 |
| paraffin     | 325 nm         | 500        | 446 nm         | 0.360 | 4.7  | 0.564 | 18.1  | 0.081 | 71.0  | 34.02 |
| ZrN/paraffin | 325 nm         | 500        | 443 nm         | 0.945 | 4.5  | 0.005 | 137.3 | 0.115 | 37.8  | 30.74 |
| ZrN/paraffin | 325 nm         | 500        | 396 nm         | 0.900 | 5.1  | 0.025 | 119.8 | 0.141 | 29.6  | 42.97 |
| PPT          | 325 nm         | 200        | 389 nm         | 0.949 | 5.0  | 0.098 | 14.5  | 0.000 | 0.0   | 7.18  |
| ZrN/PTT      | 355 nm         | 500        | 410 nm         | 0.188 | 19.5 | 0.803 | 5.9   | 0.029 | 155.0 | 61.22 |
